# Supplementary material
Source: ML conference proceedings conference paper supplement (https://openreview.net/forum?id=64V40K2fDv)
Supplement: supplementary_material [file attachment]

## A Implementation Details

### A.1 Dataset Description

**QM9 Dataset** The QM9 dataset [41] is a significant resource in the field of quantum chemistry, offering a single equilibrium conformation and 12 labels that include geometric, energetic, electronic, and thermodynamic properties. For the purpose of performance evaluation, we select the following properties: HOMO, LUMO, gap, alpha,  $C_v$ , mu,  $R^2$ , and ZPVE.

**COMPAS-1D Dataset** The COMPAS-1D dataset is a part of the COMPAS Project, which is an acronym for the computational Database of Polycyclic Aromatic Systems. The dataset is specifically focused on data-condensed poly-benzenoid hydrocarbons, which are a type of polycyclic aromatic hydrocarbons (PAHs) with a unique structure where the benzene rings are connected edge-to-edge. The COMPAS-1D [43] contains 8,678 molecules and offers essential computational properties crucial for comprehending the behavior of polycyclic aromatic hydrocarbons and other organic molecules across various chemical and physical processes.

### A.2 Hyperparameter Settings

In line with previous methods, we employ grid search to find the optimal hyper-parameters for tasks within the QM9 and COMPAS-1D datasets. The specific hyper-parameters are detailed in Table 7. In all experiments, we select the checkpoint with the lowest validation loss and report the corresponding test set results based on that checkpoint. For the COMPAS-1D dataset, experiments were conducted using a single A100 GPU, whereas for the QM9 dataset, the experiments were run on eight A100 GPUs.

Table 7: Hyper-paramters for fine-tuning on QM9 and COMPAS-1D Dataset

| Hyperparameter | Value or description                 |
|----------------|--------------------------------------|
| Learning rate  | [4e-5, 6e-5, 1e-4, 2e-4, 3e-4, 4e-4] |
| Batch size     | [32, 64, 128]                        |
| Epochs         | [40, 60, 80, 100, 200, 300]          |
| Pooler dropout | [0.0, 0.1]                           |
| Warmup ratio   | [0.0, 0.06, 0.1]                     |

## B Infrastructures

We utilize an efficient distributed PyTorch framework called Uni-Core [46], specifically designed for swiftly developing high-performance PyTorch models [47], particularly those based on Transformer architectures[48]. Given the variability in molecule lengths, padding inputs to match the maximum molecular length is necessary during training. Consequently, the batch size for model training is influenced by the longest molecule in each batch. However, since molecule lengths follow a long-tail distribution (with the majority falling within a specific range), we employ dynamic batching techniques to enhance GPU utilization. By adjusting batch sizes according to the maximum lengths of different batches, we can significantly boost GPU utilization with minimal effort.

The time consumption of reading data from distributed storage is often overlooked. We employ a singular, dedicated process on each computational node to asynchronously replicate the training dataset of each epoch onto the host machine. This strategy effectively mitigates time overheads, thereby obscuring the duration spent on data reading from distributed storage. To resume the corruption due to the infra and other factors effectively, we save model weight and optimizer state for every 1k step asynchronously. This means we will lose 1k step training resources in the worst case of hardware instability or loss spike during training. Meanwhile, any checkpoints exceeding the most recent ten files will be deleted to avoid consuming too much storage space.

## 432 **C Limitations**

433 The major limitation of our study pertains to the absence of an exploration of the optimal batch size  
434 and learning rate. Our investigation primarily focuses on analyzing and delineating the power-law  
435 relationships among validation loss, model size, dataset size, and computational resources. The  
436 predictive accuracy of performance aligns well with the scaling curve, indicating that the current  
437 optimal learning rate and batch size approximate the near-optimal values. However, existing research  
438 suggests a progressive increase in the optimal batch size with augmented computing resources, while  
439 the optimal learning rate tends to decrease gradually. It is necessary to note that as we further increase  
440 the model’s parameters, the final optimal values for learning rate and batch size may fall outside the  
441 currently identified range. Consequently, investigating the scaling law for optimal batch size and  
442 learning rate is also paramount.
